# Supplementary material
Source: PubMed Central journal article supplement (PMC1544197)
Supplement: pnas_0604935103_1.pdf [file pnas_0604935103_1.pdf]

*BjHMGS1*

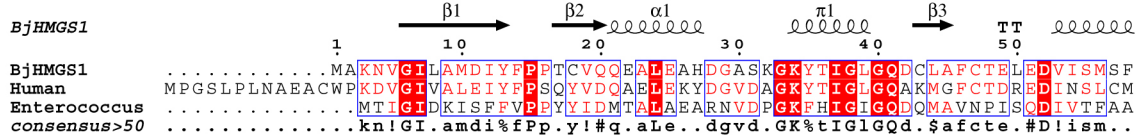

*BjHMGS1*

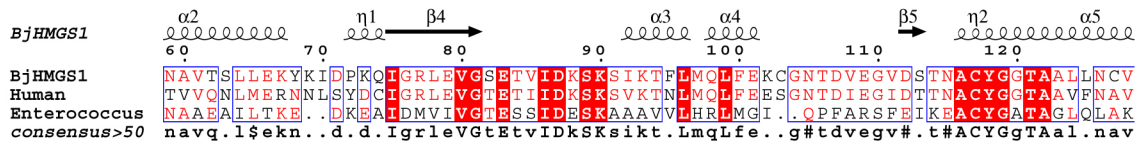

*BjHMGS1*

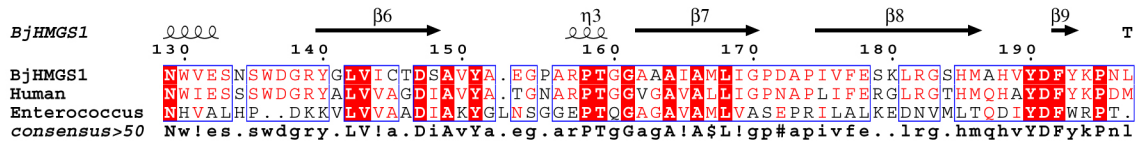

*BjHMGS1*

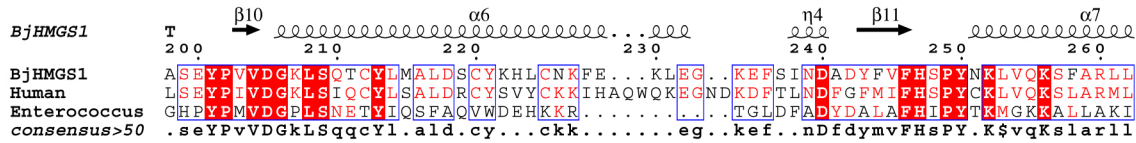

*BjHMGS1*

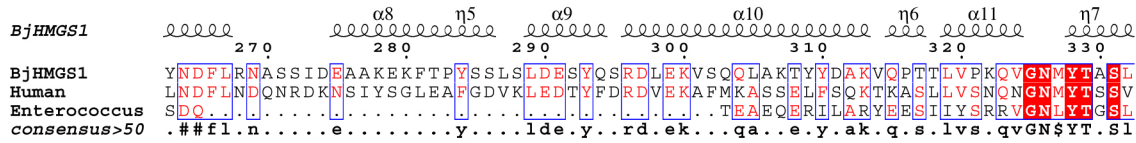

*BjHMGS1*

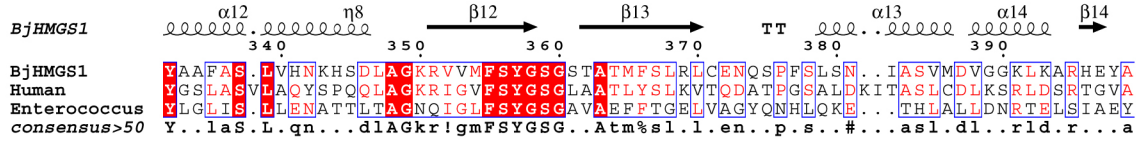

*BjHMGS1*

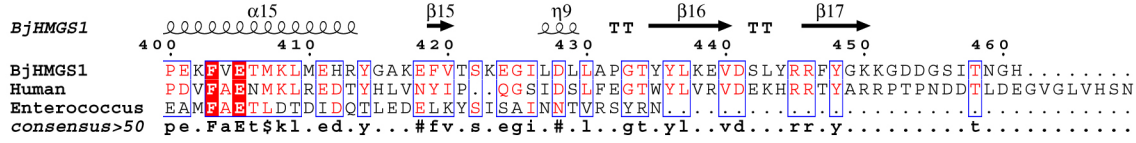

*BjHMGS1*

*BjHMGS1*  
 Human  
 Enterococcus  
 consensus>50
